# Supplementary material for: Phylogeny-Aware Analysis of Metagenome Community Ecology Based on Matched Reference Genomes while Bypassing Taxonomy
Source: PubMed Central journal article supplement (PMC9040630; doi:10.1128/msystems.00167-22), 2022-04-04

OGU

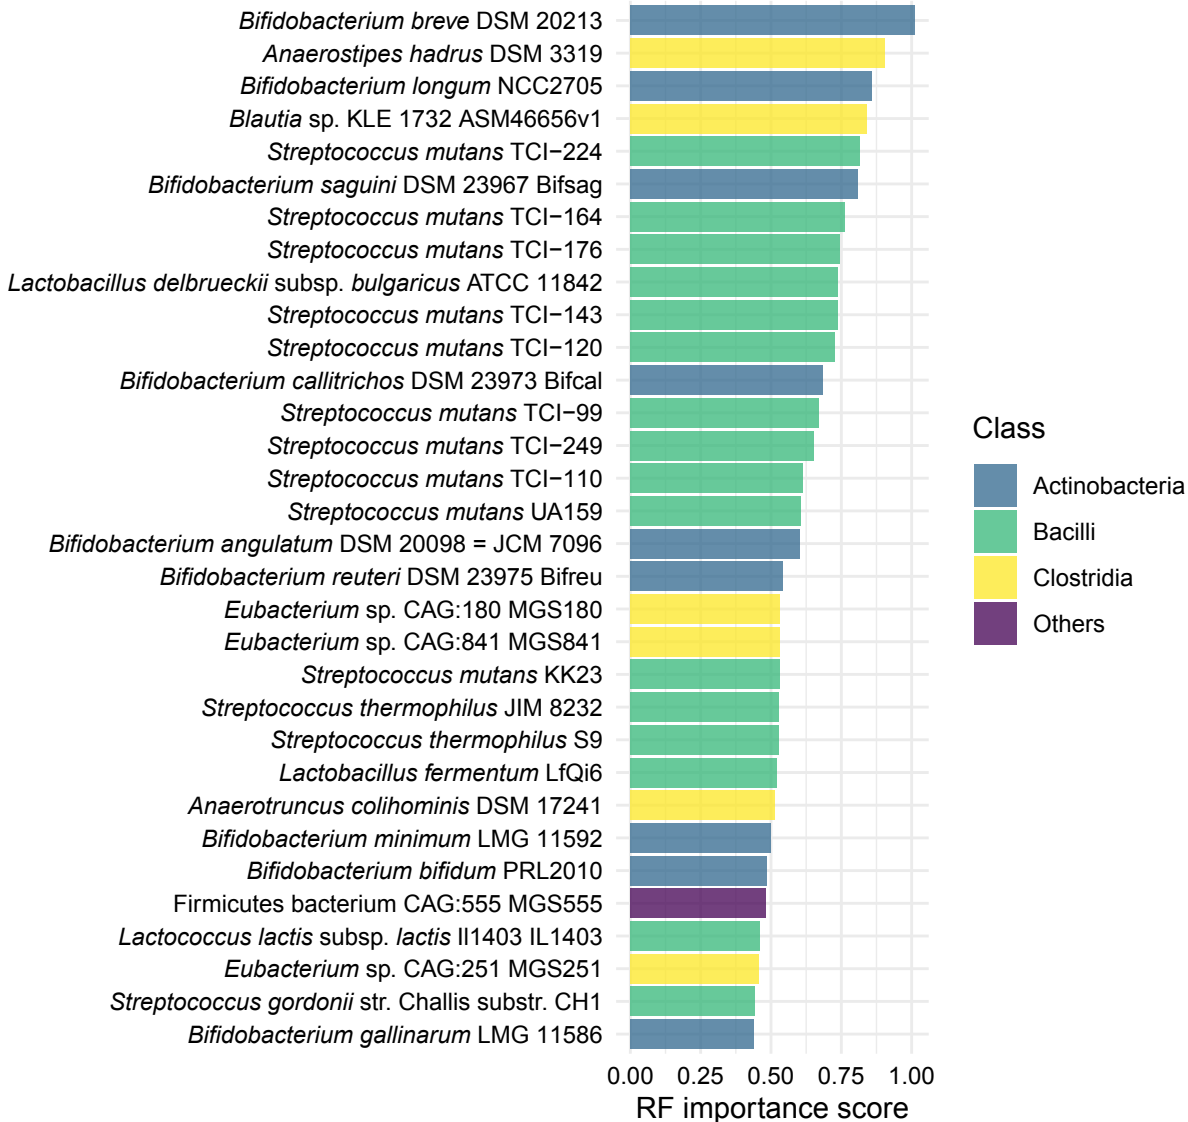

Supplement: msystems.00167-22-sf006.pdf [file msystems.00167-22-sf006.pdf]
